# Supplementary material
Source: PubMed Central journal article supplement (PMC3811347)
Supplement: AEM.01560-13_zam999104722so1.pdf [file AEM.01560-13_zam999104722so1.pdf]

## SUPPLEMENTAL DATA

**FIG S1:** Alignment of the eight GH36 conserved motifs (M1 to M8) found in the Aga protein of *L. lactis* subsp. *lactis* strain A12 and strain KF147, and *L. raffinolactis* strain ATCC 43920.

Amino acids specific to strain A12 are indicated in bold.

### Motif 1

|            |                           |
|------------|---------------------------|
| A12        | <b>ENFGDCYGF</b> NLVYSGN  |
| KF147      | E <b>FT</b> GTAIGLTLVYSGN |
| ATCC 43920 | <b>EL</b> TGTAIGLTLVYSGN  |

### Motif 2

|            |                               |
|------------|-------------------------------|
| A12        | <b>APEAVLSYSANGFAQLSQ</b> NFH |
| KF147      | SPEALLVYSDQGLNGMSQTFH         |
| ATCC 43920 | SPEALLVYSDQGLNGMSQTFH         |

### Motif 3

|            |                          |
|------------|--------------------------|
| A12        | PILINNWEATY <b>F</b> DFT |
| KF147      | PILINNWEATY <b>F</b> DFD |
| ATCC 43920 | PILINNWEATY <b>F</b> DFD |

### Motif 4

|            |                         |
|------------|-------------------------|
| A12        | <b>IGVDMLVM</b> DDGWFGN |
| KF147      | LGIELFVLDDGWFGK         |
| ATCC 43920 | LGIELFVLDDGWFGK         |

### Motif 5

|            |                            |
|------------|----------------------------|
| A12        | FGIWFEP <b>EMVSEESK</b> LF |
| KF147      | FGLWFEP <b>EMVNADSD</b> LF |
| ATCC 43920 | FGLWFEP <b>EMVNADSD</b> LF |

### Motif 6

|            |                          |
|------------|--------------------------|
| A12        | <b>VLDSTNIEYVK</b> WDMNR |
| KF147      | ILDTIDIDYIKWDMNR         |
| ATCC 43920 | ILDTIDIDYIKWDMNR         |

### Motif 7

|            |                           |
|------------|---------------------------|
| A12        | <b>NILFEGCAGGGGR</b> FDLG |
| KF147      | HILWEGCSGGGGRFDAG         |
| ATCC 43920 | HVLWEGCSGGGGRFDAG         |

### Motif 8

|            |                            |
|------------|----------------------------|
| A12        | WTSDNTDAIN <b>RLKIQ</b> YG |
| KF147      | WTSDNTDA <b>VERLDI</b> QYG |
| ATCC 43920 | WTSDNTDA <b>IERLEI</b> QYG |

**TABLE S1:** Phenotypic comparison of strains A12 and IL1403 by Biolog assay analysis. The values correspond to the difference between the heights of the kinetic curves of the strains at 24 h, 36 h and 48 h. Positive arbitrary values indicate phenotypes more pronounced in strain A12 and negative arbitrary values indicate those more pronounced in strain IL1403.

| Microplate | Well | Test                                    | 24 h | 36 h | 48 h |
|------------|------|-----------------------------------------|------|------|------|
| PM01       | A02  | L-Arabinose                             | 160  | 163  | 164  |
| PM01       | B08  | D-Xylose                                | 115  | 123  | 126  |
| PM01       | C11  | D-Melibiose                             | 149  | 151  | 152  |
| PM02       | D05  | Stachyose                               | 146  | 149  | 150  |
| PM02       | D01  | D-Raffinose                             | 140  | 143  | 140  |
| PM01       | B06  | D-Gluconic Acid                         | 138  | 145  | 148  |
| PM01       | D09  | $\alpha$ -D-Lactose                     | 99   | 110  | 112  |
| PM01       | D11  | Sucrose                                 | 80   | 100  | 110  |
| PM01       | A06  | D-Galactose                             | 47   | 45   | 45   |
| PM02       | C07  | $\beta$ -Methyl-D-Galactoside           | 31   | 56   | 72   |
| PM01       | D08  | $\alpha$ -Methyl-D-Galactoside          | 116  | 126  | 132  |
| PM01       | F11  | D-Cellobiose                            | 84   | 83   | 82   |
| PM02       | B08  | Arbutin                                 | 84   | 75   | 72   |
| PM02       | C01  | Gentiobiose                             | 80   | 73   | 69   |
| PM02       | B04  | Amygdalin                               | 37   | 63   | 79   |
| PM01       | E08  | $\beta$ -Methyl-D-Glucoside             | 126  | 120  | 114  |
| PM01       | C09  | $\alpha$ -D-Glucose                     | 47   | 47   | 46   |
| PM01       | A10  | D-Trehalose                             | 68   | 66   | 65   |
| PM01       | G08  | N-Acetyl- $\beta$ -D-Mannosamine        | 75   | 75   | 75   |
| PM01       | A03  | N-Acetyl-D-Glucosamine                  | 73   | 72   | 72   |
| PM01       | A11  | D-Mannose                               | 64   | 61   | 59   |
| PM01       | C07  | D-Fructose                              | 53   | 51   | 50   |
| PM09       | E12  | 7% Urea                                 | 49   | 63   | 71   |
| PM09       | E11  | 6% Urea                                 | 124  | 134  | 137  |
| PM09       | E10  | 5% Urea                                 | 93   | 78   | 59   |
| PM09       | E09  | 4% Urea                                 | 104  | 90   | 72   |
| PM09       | F03  | 3% Sodium Lactate                       | 47   | 65   | 74   |
| PM13       | H03  | Cupric Chloride                         | 76   | 86   | 91   |
| PM02       | A05  | g-Cyclodextrin                          | -92  | -53  | -30  |
| PM13       | C04  | t-Butyl Hydroquinone                    | -79  | -61  | -53  |
| PM10       | E04  | pH 9.5 + L-Asparagine                   | -79  | -73  |      |
| PM09       | A07  | 6% NaCl                                 | -66  | -69  | -70  |
| PM09       | A08  | 6.5% NaCl                               | -77  | -84  | -88  |
| PM09       | A09  | 7% NaCl                                 | -59  | -67  | -71  |
| PM09       | B05  | 6% NaCl + Dimethyl Sulphonyl Propionate | -65  | -66  | -64  |
| PM09       | E06  | 6% Sodium Formate                       | -64  | -61  | -56  |
| PM01       | B03  | Glycerol                                | -25  | -37  | -43  |

**TABLE S2:** Number and name of strain A12 genes overlapping with the growth rate regulon (22) and genes differentially expressed when comparing two sugar sources. On the selected sugar couples, strain A12 displayed variable growth rates (Table 4). Gal: galactose; Glu: glucose; Ara: arabinose; Fru: fructose.

|                                                                 | Gal/Glu                                                                                                                                                                                                                                                                                                                                                             | Fru/Glu                                        | Ara/Glu    | Ara/Fru                                                                                               | Ara/Gal                      |
|-----------------------------------------------------------------|---------------------------------------------------------------------------------------------------------------------------------------------------------------------------------------------------------------------------------------------------------------------------------------------------------------------------------------------------------------------|------------------------------------------------|------------|-------------------------------------------------------------------------------------------------------|------------------------------|
| <b>Number of genes differentially expressed</b>                 | 178                                                                                                                                                                                                                                                                                                                                                                 | 37                                             | 56         | 159                                                                                                   | 18                           |
| <b>Number of genes overlapping with the growth rate regulon</b> | 59                                                                                                                                                                                                                                                                                                                                                                  | 8                                              | 2          | 17                                                                                                    | 5                            |
| <b>Name of overlapping genes</b>                                | butB, ceo, dhal, dhaM, fmt, glpD, glpF2, metF, napC, pi244, ptbA, purl, rbsK, rliDB, yjdA, yjiB, ymgI, ymhC, ynfC, yphI, yrjB, yrjC, ytiA, yucG, ywgA, accD, apt, aroH, carA, dltC, guaA, ileS, infA, lysQ, metS, murA2, pepC, phnA, ps303, rplM, rplO, rpmE, rpsI, rpsJ, rpsS, thrA, ybfC, yfdB, yhcA, yjbC, ymeB, yneG, yneH, ynhD, yqaC, ythA, ythC, yvdF, yxdF, | carA, ileS, pgmB, ps303, pyrC, ythA, ythC, yxd | yrjB, ctrA | accD, atpG, ileS, optF, potD, ybfC, yldC, ytgG, ythA, ythC, mgtA, pi209, ycfH, yciA, yijG, ymhG, ypbB | accD, dltC, glpD, purM, yrjB |

**TABLE S3:** Functions of genes specifically induced by *L. lactis* subsp. *lactis* strain A12 when grown on galactose (Gal), fructose (Fru), glucose (Glc), raffinose (Raff) or arabinose (Ara). Functional categories were defined according to (20). Ratio value analysis, obtained from four replicates, allowed genes with specific variation of expression in one sugar to be identified. Ratio values were associated with a p-value of less than 0.05 and a false discover rate below 0.1 or 0.05 (genes in bold). Experiments were performed in four replicates. \*: genes lacking in strain IL1403.

### Galactose

| Gene        | CAT    | function                                  | Gal/Glc ratio | Gal/Fru ratio | Gal/Ara ratio |
|-------------|--------|-------------------------------------------|---------------|---------------|---------------|
| <b>galK</b> | NRJsug | galactokinase                             | 16.26         | 16.33         | 12.50         |
| <b>galM</b> | NRJsug | aldose 1-epimerase                        | 15.09         | 13.78         | 11.11         |
| <b>galT</b> | NRJsug | galactose-1-phosphate uridylyltransferase | 10.36         | 7.82          | 7.69          |
| <b>lacZ</b> | NRJsug | beta-galactosidase                        | 8.22          | 7.49          | 9.09          |
| <b>galE</b> | NRJsug | UDP-glucose 4-epimerase                   | 5.00          | 3.83          | 4.17          |
| <b>yugB</b> | NRJaer | oxidoreductase                            | 4.88          | 5.40          | 5.88          |
| <b>yugA</b> | REGgen | transcription regulator                   | 4.39          | 4.43          | 4.35          |
| yrjB        | NRJaer | oxidoreductase                            | 2.31          | 1.91          | 1.52          |
| glpD        | NRJana | glycerol-3-phosphate dehydrogenase        | 1.66          | 1.60          | 1.45          |
| <b>scrK</b> | NRJsug | fructokinase                              | 1.65          | 2.28          | 1.82          |
| argF        | NRJAmi | ornithine carbamoyltransferase            | 1.62          | 1.58          | 1.61          |
| pi318       | OTHpha | prophage pi3 protein 18                   | 1.56          | 1.35          | 1.45          |
| ypcA        | NRJsug | beta-glucosidase                          | 1.56          | 2.24          | 1.41          |
| ypcG        | TSPcar | sugar ABC transporter permease protein    | 1.56          | 1.58          | 1.56          |
| argE        | AMlglu | acetylornithine deacetylase               | 1.54          | 2.63          | 2.38          |
| ymjE        | ENVsur | glycosyl transferase                      | 1.52          | 1.32          | 1.19          |

|              |        |                                                                |      |      |      |
|--------------|--------|----------------------------------------------------------------|------|------|------|
| <b>bglH</b>  | NRJsug | beta-glucosidase                                               | 1.35 | 1.80 | 1.39 |
| dnaJ         | REPsyn | DnaJ                                                           | 1.28 | 1.13 | 1.20 |
| hom          | AMlasp | homoserine dehydrogenase                                       | 0.67 | 0.70 | 0.79 |
| busAA        | TSPami | betaine ABC transporter ATP binding protein                    | 0.56 | 0.36 | 0.50 |
| <b>blt</b>   | TSPmdr | multidrug efflux transporter                                   | 0.50 | 0.70 | 0.67 |
| <b>busAB</b> | TSPami | betaine ABC transporter permease and substrate binding protein | 0.50 | 0.32 | 0.44 |
| lysA         | AMlasp | diaminopimelate decarboxylase                                  | 0.50 | 0.65 | 0.65 |
| <b>lysP</b>  | TSPami | lysine specific permease                                       | 0.35 | 0.49 | 0.47 |

### Fructose

| <b>Gene</b>      | <b>CAT</b> | <b>function</b>                                                | <b>Fru/Glc ratio</b> | <b>Fru/Gal ratio</b> | <b>Fru/Ara ratio</b> |
|------------------|------------|----------------------------------------------------------------|----------------------|----------------------|----------------------|
| <b>lacC=fruC</b> | NRJsug     | tagatose-6-phosphate kinase                                    | 4.73                 | 5.26                 | 4.17                 |
| <b>glmS</b>      | INTami     | glucosamine-fructose-6-phosphate aminotransferase              | 2.95                 | 2.63                 | 2.86                 |
| <b>yjgB</b>      | UNK        | hypothetical protein                                           | 2.91                 | 4.00                 | 3.13                 |
| yrbB             | UNK        | hypothetical protein                                           | 2.33                 | 1.96                 | 3.03                 |
| yuaE             | UNK        | hypothetical protein                                           | 1.89                 | 2.00                 | 1.92                 |
| <b>LL2150*</b>   | UNK        | hypothetical protein                                           | 1.71                 | 1.82                 | 1.82                 |
| radC             | REPsyn     | DNA repair protein RadC                                        | 1.69                 | 1.59                 | 1.75                 |
| busAB            | TSPami     | betaine ABC transporter permease and substrate binding protein | 1.55                 | 3.13                 | 1.39                 |
| yqeD             | UNK        | hypothetical protein                                           | 1.45                 | 1.47                 | 1.54                 |
| LL1032*          | TSPmdr     | Putative ABC-type multidrug transport system, ATPase component | 0.77                 | 0.83                 | 0.81                 |
| yucG             | INTdeg     | chitin binding protein                                         | 0.73                 | 0.51                 | 0.70                 |
| ackA1            | NRJfer     | acetate kinase                                                 | 0.71                 | 0.88                 | 0.80                 |
| adhE             | NRJfer     | alcohol-acetaldehyde dehydrogenase                             | 0.56                 | 0.66                 | 0.55                 |
| ycrA             | NRJsug     | phospho-beta-glucosidase                                       | 0.52                 | 0.44                 | 0.58                 |
| adhA             | NRJfer     | alcohol dehydrogenase                                          | 0.44                 | 0.37                 | 0.44                 |

### Glucose

| <b>Gene</b> | <b>CAT</b> | <b>function</b>       | <b>Glc/Gal<br/>ratio</b> | <b>Glc/Fru<br/>ratio</b> | <b>Glc/Ara<br/>ratio</b> |
|-------------|------------|-----------------------|--------------------------|--------------------------|--------------------------|
| metE        | AMlasp     | 5-methionine synthase | 0.47                     | 0.33                     | 0.49                     |

### Raffinose

| <b>Gene</b> | <b>CAT</b> | <b>function</b>                               | <b>Raff/Fru<br/>ratio</b> | <b>Raff/Gal<br/>ratio</b> | <b>Raff/Glu<br/>ratio</b> |
|-------------|------------|-----------------------------------------------|---------------------------|---------------------------|---------------------------|
| aga*        | NRJsug     | Putative alpha galactosidase (GH 36)          | 10.51                     | 5.23                      | 10.61                     |
| LL2138*     | TSPcar     | Putative Na <sup>+</sup> /raffinose symporter | 8.45                      | 4.18                      | 9.34                      |
| sucP*       | NRJsug     | Putative sucrose phosphorylase (GH 13)        | 4.32                      | 3.21                      | 5.15                      |

### Arabinose

| <b>Gene</b> | <b>CAT</b> | <b>function</b>                                        | <b>Ara/Fru<br/>ratio</b> | <b>Ara/glu<br/>ratio</b> | <b>Ara/Gal<br/>ratio</b> |
|-------------|------------|--------------------------------------------------------|--------------------------|--------------------------|--------------------------|
| araD*       | NRJsug     | Putative L-ribulose-5-phosphate 4-epimerase            | 9.61                     | 14.04                    | 11.81                    |
| araA*       | NRJsug     | Putative L-arabinose isomerase                         | 8.46                     | 10.34                    | 9.53                     |
| araT*       | NRJsug     | Putative arabinose transporter                         | 8.41                     | 12.3                     | 9.7                      |
| araB*       | NRJsug     | Putative Carbohydrate kinase, possible xylulose kinase | 7.23                     | 8.99                     | 7.11                     |
| ptk         | NRJpen     | phosphoketolase                                        | 3.52                     | 5.89                     | 3.44                     |
| xylT        | TPScar     | D-xylulose proton-symporter                            | 2.83                     | 2.49                     | 2.4                      |
| xylX        | NRJsug     | putative acetyltransferase                             | 2.34                     | 2.62                     | 2.18                     |
| araR*       | NRJsug     | Putative Regulatory protein                            | 2.21                     | 3.16                     | 3.33                     |
| arcB        | NRJami     | ornithine carbamoyltransferase                         | 1.49                     | 1.98                     | 1.5                      |
